# Supplementary material for: Effect of Encapsulation Material on Lipid Bioaccessibility and Oxidation during In Vitro Digestion of Black Seed Oil
Source: MDPI journal article supplement (doi:10.3390/antiox12010191), 2023-01-13
Supplement: s1 [file s1]

## ***Supplementary Material***

### **Composition of the juices employed in the *in vitro* digestion model**

- The saliva contained 12.02 mmol/L KCl, 5.10 mmol/L NaCl, 20.17 mmol/L NaHCO<sub>3</sub>, 7.40 mmol/L NaH<sub>2</sub>PO<sub>4</sub>, 4.79 mmol/L Na<sub>2</sub>SO<sub>4</sub>, 2.06 mmol/L KSCN, 3.33 mmol/L urea, 0.09 mmol/L uric acid, 0.025 g/L mucin and 0.29 g/L *A. oryzae*  $\alpha$ -amylase. The pH of the saliva was 6.9 $\pm$ 0.1.
- The gastric juice contained 11.06 mmol/L KCl, 47.09 mmol/L NaCl, 0.22 mmol/L NaH<sub>2</sub>PO<sub>4</sub>, 5.72 mmol/L NH<sub>4</sub>Cl, 2.72 mmol/L CaCl<sub>2</sub>\*2H<sub>2</sub>O, 6.50 mL/L HCl (37 %), 1.42 mmol/L urea, 3.61 mmol/L glucose, 1.00 mmol/L bovine serum albumin, 3.00 g/L mucin, 100 U/mL *A. niger* lipase and 2.50 g/L pepsin. The pH was 1.3 $\pm$ 0.1.
- The duodenal juice contained 7.57 mmol/L KCl, 119.98 mmol/L NaCl, 40.33 mmol/L NaHCO<sub>3</sub>, 0.59 mmol/L KH<sub>2</sub>PO<sub>4</sub>, 0.53 mmol/L MgCl<sub>2</sub>, 1.36 mmol/L CaCl<sub>2</sub>\*2H<sub>2</sub>O, 1.36 mL/L HCl (37 %), 0.18 mmol/L urea, 1.67 mmol/L glucose, 1.00 mmol/L bovine serum albumin, 9.00 g/L pancreatin and 1.5 g/L lipase type II from porcine pancreas. The pH of the duodenal juice was 8.1 $\pm$ 0.1.
- The bile juice contained 5.05 mmol/L KCl, 89.99 mmol/L NaCl, 68.86 mmol/L NaHCO<sub>3</sub>, 1.51 mmol/L CaCl<sub>2</sub>\*2H<sub>2</sub>O, 0.15 mL/L HCl (37 %), 4.16 mmol/L urea, 1.80 mmol/L bovine serum albumin and 18.75 g/L bovine bile extract. The pH of the bile juice was 8.2 $\pm$ 0.1.

**Supplementary Table 1 (Table S1):** Chemical shift assignments of  $^1\text{H}$  NMR signals of protons of acyl groups (AG), fatty acids (FA), glycerides (MG: monoglycerides. DG: diglycerides. TG: triglycerides), alkanals and some sterols in  $\text{CDCl}_3$ .

| Peak                       | Structures                      | Chemical shift (ppm) |
|----------------------------|---------------------------------|----------------------|
| <b>A</b>                   | AG in TG                        | 2.36–2.26            |
|                            | AG in 1,2-DG                    | 2.33                 |
|                            | AG in 1,3-DG, 1-MG and FA       | 2.35                 |
|                            | AG in 2-MG                      | 2.38                 |
| <b>B</b>                   | linoleic in AG and FA           | 2.77                 |
| <b>C</b>                   | linolenic in AG and FA          | 2.80                 |
| <b>D</b>                   | glyceryl group in <b>1-MG</b>   | 3.65                 |
| <b>E</b>                   | glyceryl group in <b>1,2-DG</b> | 3.73                 |
| <b>F</b>                   | glyceryl group in <b>2-MG</b>   | 3.84                 |
| <b>G</b>                   | glyceryl group in <b>1-MG</b>   | 3.94                 |
| <b>H</b>                   | glyceryl group in <b>1,3-DG</b> | 4.21-4.05            |
| <b>I</b>                   | glyceryl group in <b>TG</b>     | 4.22                 |
| <b>Oxidation compounds</b> |                                 |                      |
|                            | n-alkanals                      | 9.75                 |
| <b>Sterols</b>             |                                 |                      |
|                            | esters of cycloartenol          | 0.58                 |
|                            | sitostanol                      | 0.65                 |
|                            | $\Delta^7$ -avenasterol         | 0.54                 |
|                            | thymoquinone                    | 6.56-6.60            |

\*The assignment of the  $^1\text{H}$  NMR signals of the protons was done as in previous studies (Guillén & Ruiz, 2003; Ruiz-Aracama et al., 2017; Alberdi-Cedeño et al., 2020d; Goryainov et al., 2020).

**Supplementary Table 2 (Table S2).** Free oxylipins detected by LC-MS based on previous publications (Dufour & Loonis, 2005; Emami et al., 2020).

| <b>Free oxylipin</b>   | <b>Precursor ion<br/>(m/z)</b> | <b>Product ion<br/>(m/z)</b> | <b>Collision<br/>energy (V)</b> | <b>Retention time<br/>(min)</b> |
|------------------------|--------------------------------|------------------------------|---------------------------------|---------------------------------|
| <b>9(10)-EpOME</b>     | 295.3                          | 171.1                        | 7                               | 25.0                            |
| <b>12 (13)-EpOME</b>   | 295.3                          | 195.2                        | 7                               | 24.8                            |
| <b>9,10-DiHOME</b>     | 313.2                          | 201.2                        | 16                              | 17.5                            |
| <b>12,13-DiHOME</b>    | 313.2                          | 183.2                        | 16                              | 16.6                            |
| <b>9-HODE</b>          | 295.2                          | 171.1                        | 10                              | 24.9                            |
| <b>13-HODE</b>         | 295.2                          | 195.2                        | 13                              | 24.8                            |
| <b>9-oxo-ODE</b>       | 293.2                          | 185.1                        | 13                              | 26.7                            |
| <b>13-oxo-ODE</b>      | 293.2                          | 195.1                        | 13                              | 24.8                            |
| <b>9,10,13-TriHOME</b> | 329.2                          | 171.1                        | 16                              | 2.0                             |
| <b>9,12,13-TriHOME</b> | 329.2                          | 211.1                        | 16                              | 1.9                             |
| <b>HpOME</b>           | 311.1                          | 293.2                        | 10                              | 25.8                            |
| <b>13-HpOME</b>        | 311.1                          | 113.1                        | 20                              | 25.8                            |
| <b>9-HpOME</b>         | 311.1                          | 123.0                        | 20                              | 25.8                            |

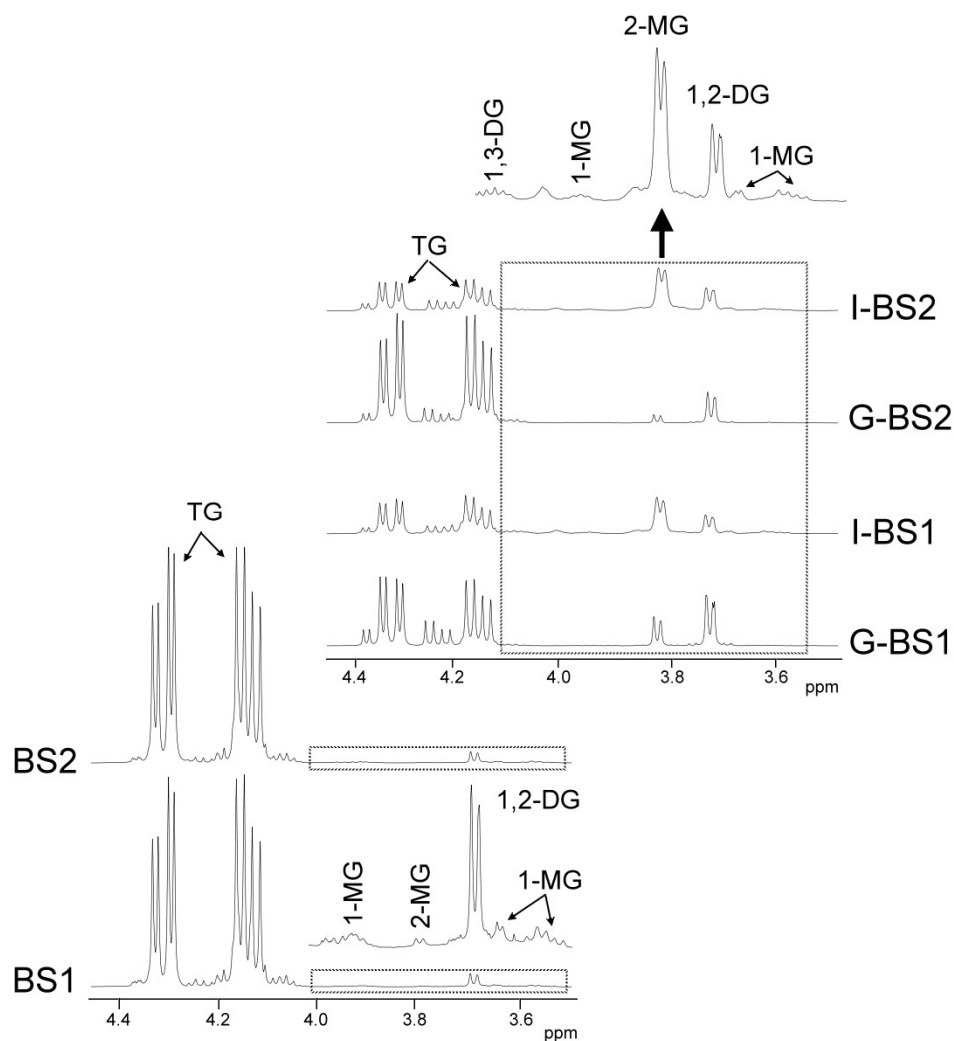

**Supplementary Figure 1 (Figure S1).**  $^1\text{H}$  NMR spectra of black seed oils 1 and 2 (BS1 and BS2) before the digestion, and of the lipid extract from the digestates after gastric (G) and intestinal (I) *in vitro* digestion (G-BS1, I-BS1, G-BS2 and I-BS2), for the region between 3.6 and 4.4 ppm. The signals are in agreement with those of table S1.
